# Supplementary material
Source: PubMed Central journal article supplement (PMC3978139)
Supplement: NIHMS85019-supplement-01.pdf [file NIHMS85019-supplement-01.pdf]

**Molecular Cell, Volume 32**

**Supplemental Data**

**Small-Molecule Inhibitors of HIF-2a**

**Translation Link Its 5'-UTR Iron-Responsive**

**Element to Oxygen Sensing**

**Michael Zimmer, Benjamin L. Ebert, Christopher Neil, Keith Brenner, Ioannis Papaioannou, Antonia Melas, Nicola Tolliday, Justin Lamb, Kostas Pantopoulos, Todd Golub, and Othon Iliopoulos**

**Figure S1. Description and validation of luciferase reporter constructs.** (a) *Schematic of HRE luciferase reporter constructs.* (b) *Fold induction of pGL3::HRE reporter constructs by cobalt chloride and desferrioxamine.* pGL3 derived reporter constructs were transiently transfected into U2OS cells and cobalt chloride (CoCl<sub>2</sub>, 150 μM) or desferrioxamine (DFO, 150 μM) was added after 16 hours. Cells were harvested at 24 hours and measured for normalized luciferase activity. Shown is the fold increase over baseline for each reporter construct. *Gray bars, CoCl<sub>2</sub>; open bars, DFO.* (c) *HRE4-luciferase reporter activity is inhibited by dominant negative HIF-2α mutants.* pGL3::HRE4 was transiently transfected into U2OS cells alone (lane 1) or with HIF-2α (P531A) (lanes 2-11), in the presence of increasing amounts of three dominant negative HIF-2α constructs, dnHIF-2α A (lanes 3-5), B (lanes 5-8) and C (lanes 9-11). (d) *Response of subcloned reporter constructs to hypoxia and hypoxia mimetics.* U2OS cells were transiently transfected with pcDNA3.1::SV40 (gray bars) or pcDNA3.1::HRE4 (open bars) plasmids and co-transfected with HIF-2α (P531A) mutant, stimulated by the hypoxia mimetics DFO or CoCl<sub>2</sub> for 12 hours, or subjected to hypoxia for 24 hours. Shown is the fold increase over baseline for each reporter construct. All experiments were performed in triplicate. Error bars represent standard error of the mean (SEM).

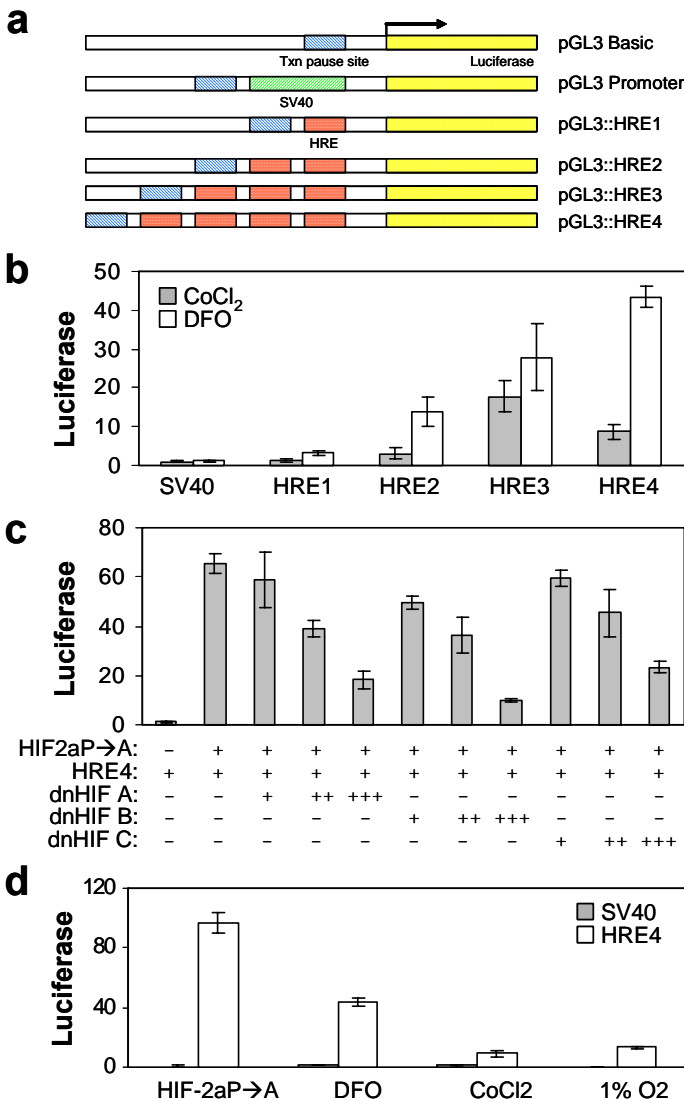

**Figure S2. Compounds affect multiple RCC cell lines.** Compounds were tested on stable polyclonal versions of VHL-defective lines expressing either the SV40- or HRE-luciferase reporter constructs. (a) A498, (b) UOK121, (c) UMRC2 and (d) UMRC3. *Gray bars*, SV40-luciferase reporter plasmid; *open bars*, HRE4-luciferase reporter plasmid. All expressed values are normalized to DMSO-only controls for each cell line. Experiments were performed in triplicate. Error bars represent standard error of the mean (SEM). For all panels: M, medium only; D, DMSO; or compounds, as indicated at the following concentrations: 40, 30  $\mu$ M; 41, 25  $\mu$ M; 76, 10  $\mu$ M; 77, 5  $\mu$ M.

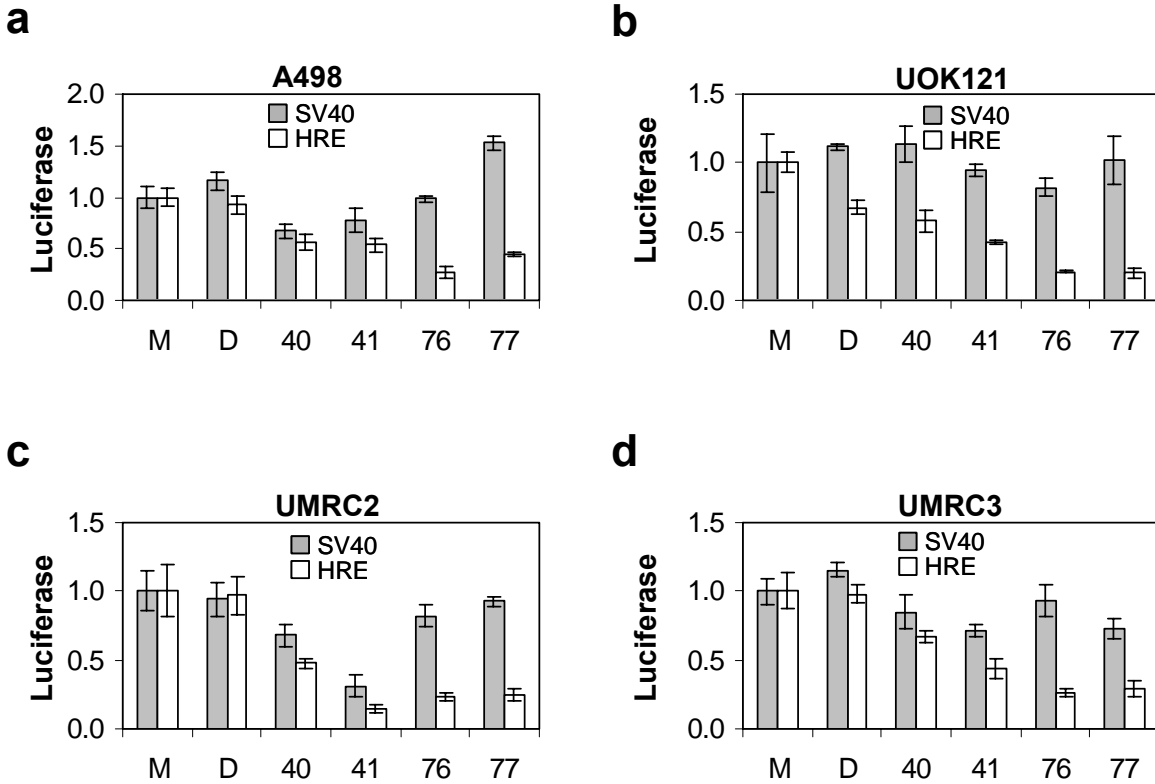

**Figure S3. No Compound significantly affects HIF-2a stability as measured by blocking *de novo* protein synthesis with cycloheximide.** (a) *Effect of compound 76 on HIF-2a protein stability.* 786-O cells were treated with compound 76 for 2 days, as described for Figure 1. *De novo* protein synthesis was then halted by the addition of 10  $\mu\text{g}/\text{mL}$  cycloheximide (CHx) and time points taken every hour for 4 hours. Lanes 1 and 2, PRC3 (VHL-deficient) versus WT8 (VHL-reconstituted) cells; lanes 3-8, control for HIF-2a expression without addition of cycloheximide (CHx) (lane 3, DMSO-only; lanes 4-8, 5  $\mu\text{M}$  76); lanes 9-14, HIF-2a expression following the addition of CHx (lane 9, DMSO-only, lanes 10-14, 5  $\mu\text{M}$  76 harvested at 0, 1, 2, 3 and 4 hours following the addition of CHx). B-Actin is shown for loading control. (b) *HIF-2a protein stability in 786-O cells treated with DMSO-only.* Identical experiment as described above without addition of compound 76. For panels A and B: P, PRC3; W, WT8; D, DMSO; 76, 5  $\mu\text{M}$  76. (c) *HIF-2a half-life in compound-treated 786-O cells following the addition of cycloheximide.* All compounds were tested analogously to 76 and the gels were quantified by gel densitometry. HIF-2a expression was corrected for B-Actin and normalized such that the band intensity in lane 10 was set at one. *Closed squares*, DMSO-only with no CHx (from panel B, lanes 4-8); *open squares*, DMSO-only with CHx (from panel B, lanes 10-14); *closed diamond*, 40 the presence of CHx; *open diamond*, 41 with CHx; *closed triangles*, 76 with CHx (from panel A, lanes 10-14); *open triangles*; 77 with CHx.

**a**

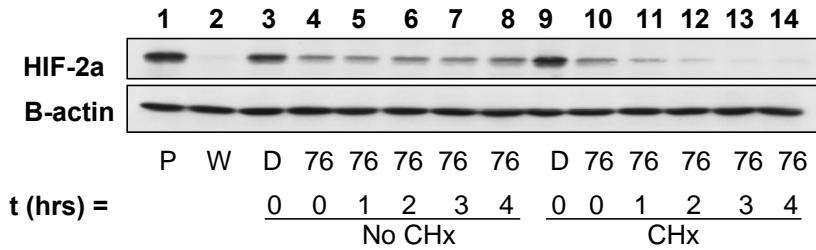

**b**

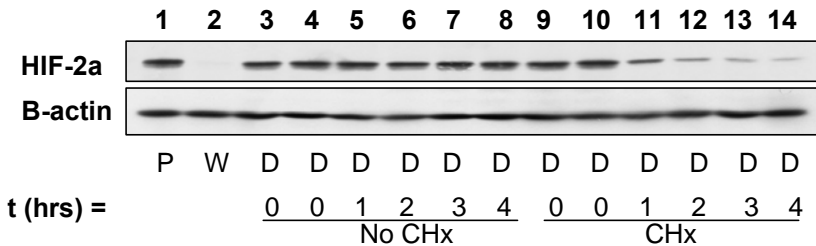

**c**

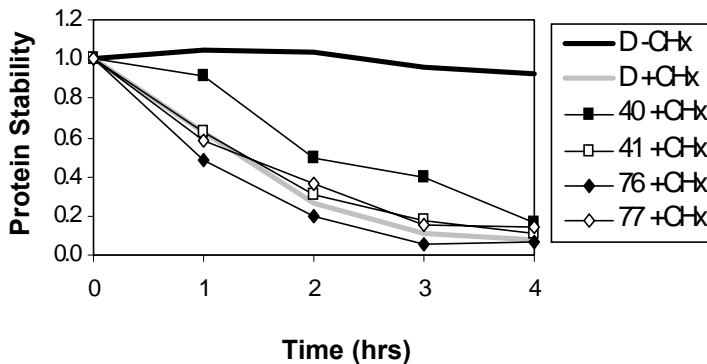

**Figure S4. Compounds decrease HIF-2a mRNA translation (presentation of the whole gel).** Cells were treated with compound as described in Figure 1 and <sup>35</sup>S-methionine pulse label immunoprecipitation was performed as described in Experimental Procedures. For HIF-2a immunoprecipitations, (-) indicates anti-HA control IP, (+) indicates IP with anti-HIF-2a antibody. Loading control is a representative section of the autoradiograph in which a 1:1000 dilution of the lysate was directly loaded. M, medium only; D, DMSO; compound numbers, as indicated at the following concentrations: 40, 30 μM; 41, 25 μM; 76, 10 μM; 77, 5 μM.

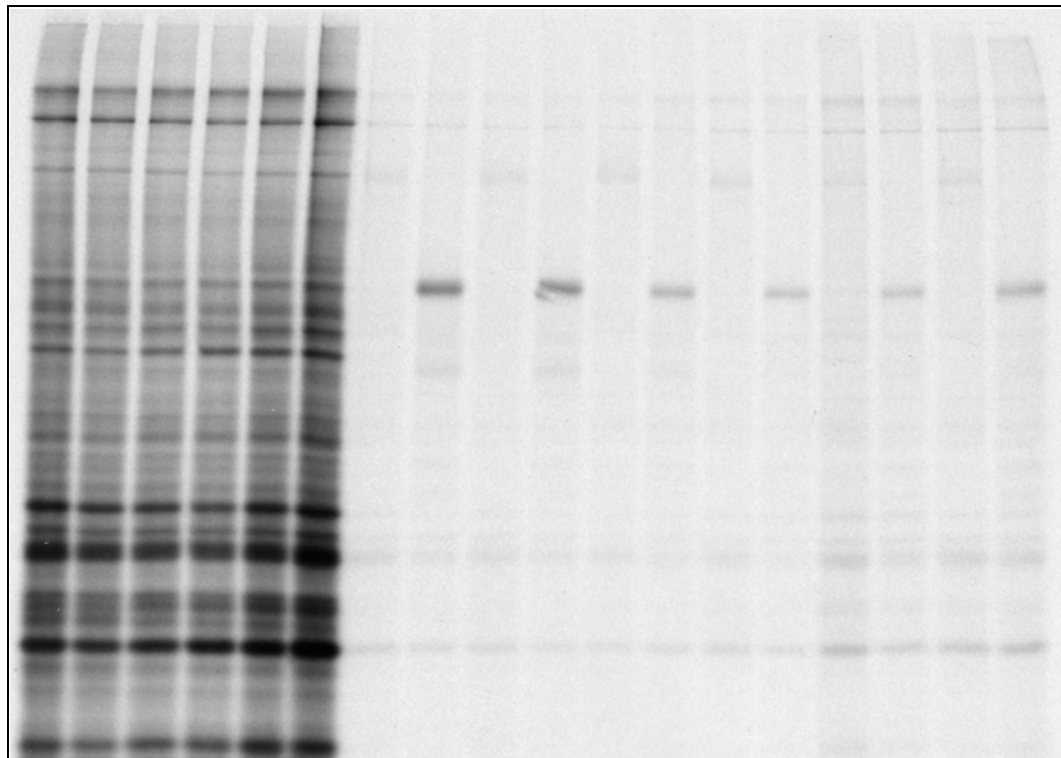

|                                                    |   |    |    |    |    |   |   |    |    |    |    |   |   |   |   |
|----------------------------------------------------|---|----|----|----|----|---|---|----|----|----|----|---|---|---|---|
| M                                                  | D | 40 | 41 | 76 | 77 | - | + | -  | +  | -  | +  | - | + | - | + |
| 1/1000 <sup>th</sup> lysate<br>for loading control |   |    |    |    |    | M | D | 40 | 41 | 76 | 77 |   |   |   |   |

**Figure S5. Compounds have no effect on HIF-2a protein stability as measured by <sup>35</sup>S-methionine pulse chase.** Cells were treated as described in Figure 1 and <sup>35</sup>S-methionine pulse-chase and immunoprecipitations were performed as described in Experimental Procedures. For HIF-2a immunoprecipitations, (-) indicates anti-HA control IP, (+) indicates IP with anti-HIF-2a. Control is a 1:1000 dilution of the lysate directly loaded. M, medium only; D, DMSO; compound numbers, as indicated at the experimentally determined IC50 values. Quantification of HIF-2a protein was determined by densitometry relative to control lanes and the resulting bar graph is shown (middle). HIF-2a expression was corrected for control and normalized such that the band intensity in all t=0 lanes was set at one (top). *Closed squares*, medium only; *open squares*, DMSO; *closed diamond*, 40; *open diamond*, 41; *closed triangles*, 76; *open triangles*, 77.

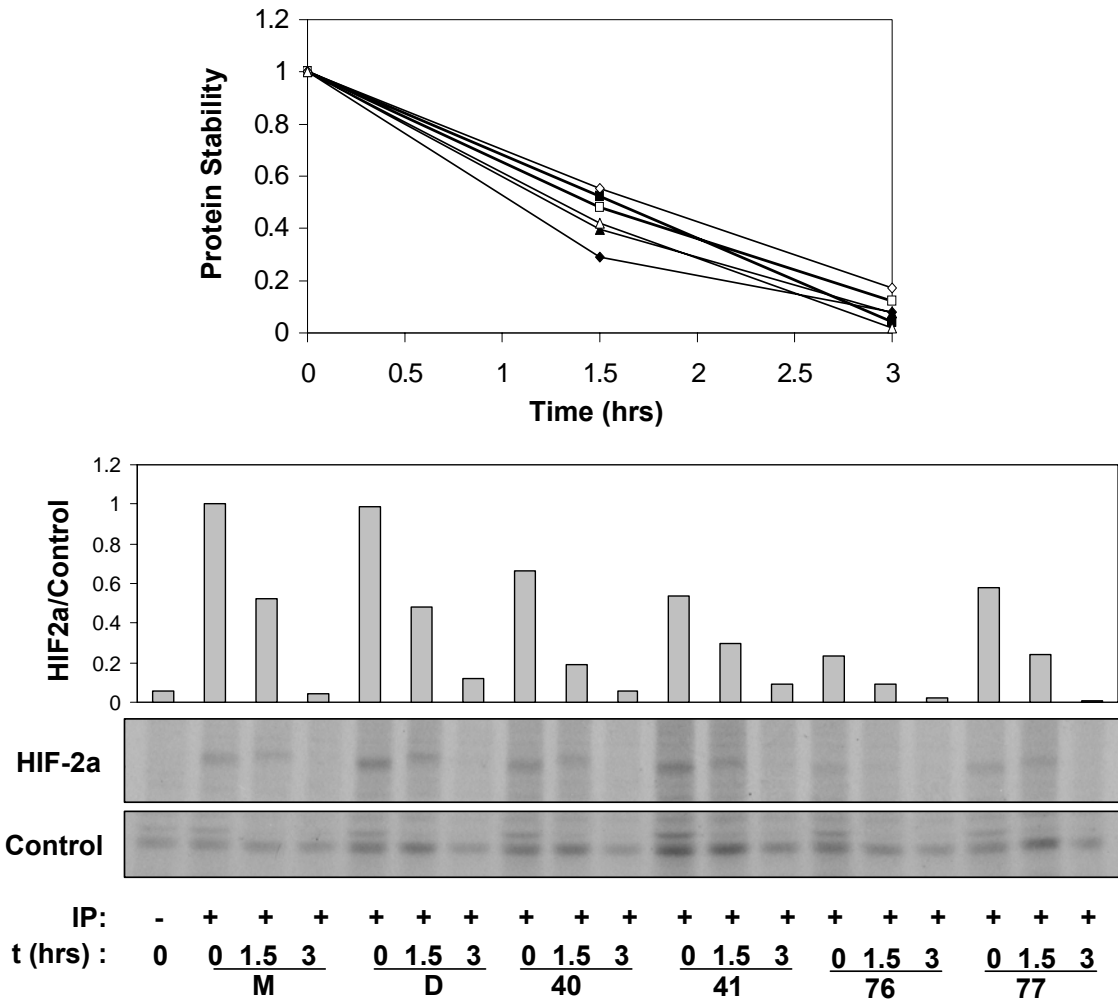

**Figure S6. Comparison of compounds to low and high dose DFO by Connectivity Map.** Gene-expression signatures obtained by treating 786-O cells with compound 40 (a), 41 (b), 76 (c) and 77 (d) were compared with multiple independent gene-expression profiles of MCF7 and PC3 cells treated with low (6  $\mu$ M) or high (100  $\mu$ M) concentrations of deferoxamine (DFO) using the Connectivity Map ([www.broad.mit.edu/cmap](http://www.broad.mit.edu/cmap)). The barviews are constructed from 6,100 horizontal lines, each representing an individual treatment, ordered by their corresponding connectivity scores with each compound signature (+1, top; -1, bottom). All DFO instances in the dataset are colored in black. Colors applied to the remaining instances reflect the sign of their scores (green, positive; gray, null; red, negative). The rank, name [instance id], concentration, cell line and connectivity score for each DFO instance is shown. Negative score indicates degree of negative correlation.

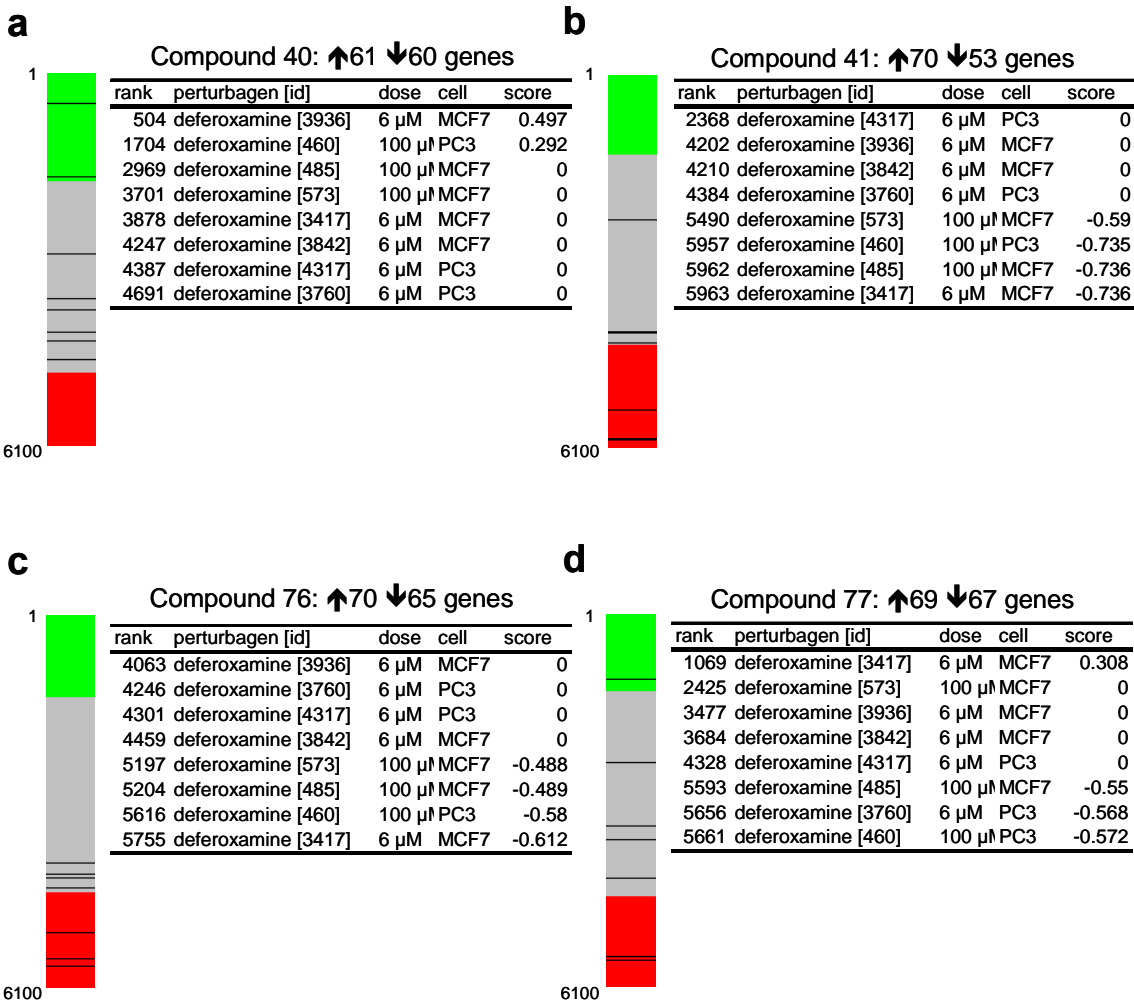

**Figure S7.** *Specific shifted band decreases in hypoxia and supershifts with IRP1 antibody.* EMSA was performed on lysates from 786-O cells subjected to 24 hours normoxia versus hypoxia. Lysates were mixed with wild-type HIF-2a IRE probe and either mock treated (No SS, for no supershift) or incubated with control, IRP1 polyclonal or IRP2 monoclonal antibodies. Control for IRP1 was preimmune sera. Control for IRP2 was purified B-Actin monoclonal. *Black arrow:* position of the shifted band, *white arrow:* position of the supershifted band.

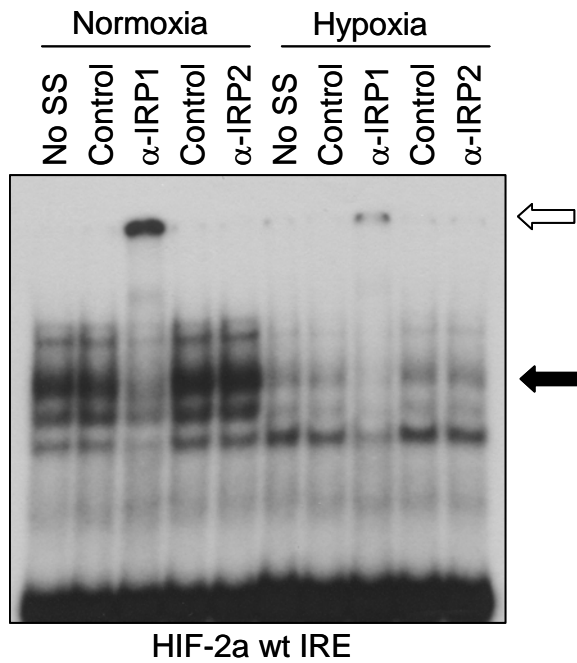



**Figure S8.** *Compound 76 enhances binding of endogenous IRP2 to Ferritin-L IRE.* EMSA was performed on 786-O lysates treated with D, DMSO, 10 $\mu$ M 76 or 150  $\mu$ M DFO in normoxia or hypoxia using either the Ferritin-L or HIF-2a IRE radiolabeled probe and supershifted with either control or anti-IRP2 (2  $\mu$ L UT29) antibody. *Black arrow:* position of the shifted band, *white arrow:* position of the supershifted band.

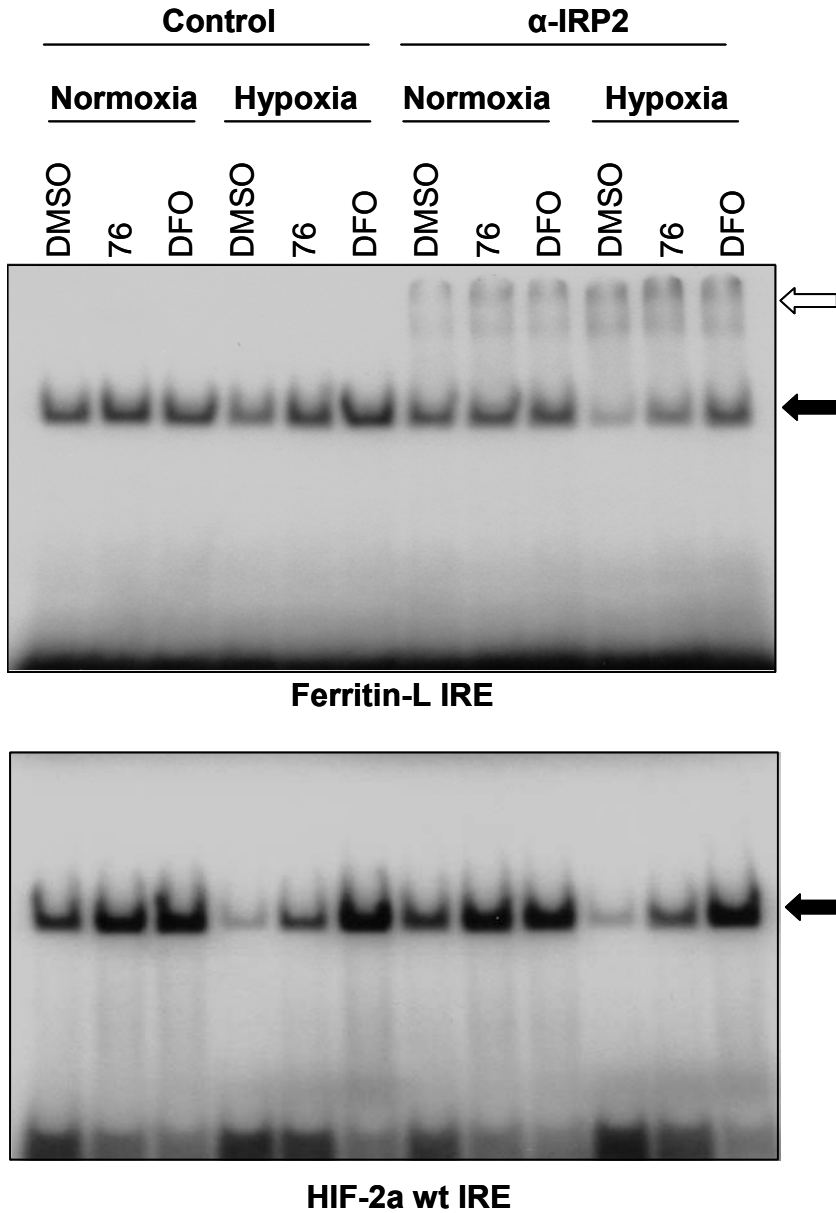

**Figure S9. Compounds do not affect putative IRE in HIF-1a 5'-UTR yet indirectly suppress hypoxic induction of HIF-1a in multiple cell types.** (a) Schematic of the HIF-2a 5'-UTR Iron-responsive element (IRE) versus the putative one located in the HIF-1a 5'-UTR. The consensus sequence of the loop and the mandatory 5' cytosine bulge are highlighted with light blue circles. (b) The putative IRE in the HIF-1a 5'-UTR is not functional. Duplicate plates of 786-O derived lines expressing the putative wild-type or mutant HIF-1a IRE were cultured in the presence of compound as described for Figure 1, with the exception that one set was placed at 1% oxygen for 24 hours following the first day's medium-change. Cells were treated with M, medium only; D, DMSO; or compounds, as indicated at the following concentrations: 40, 40  $\mu$ M; 41, 30  $\mu$ M; 76, 10  $\mu$ M; 77, 5  $\mu$ M. (c) Effect of compounds on HIF-1a in CWR22R cells and HIF-1a and HIF-2a in Hep3B cells. CWR22R or Hep3B cells were treated with compound and subjected to hypoxia as described above. B-Actin is shown for loading control. Cells were treated with M, medium only; D, DMSO; or compounds, as indicated at the following concentrations: 40, 40  $\mu$ M; 41, 30  $\mu$ M; 76, 20  $\mu$ M; 77, 7.5  $\mu$ M. Error bars represent standard error of the mean (SEM). (d) IRP1/2 do not bind to the putative HIF-1a IRE. EMSA was performed on 786-O lysates either left untreated (medium only, M) or treated with 150  $\mu$ M DFO in normoxia or hypoxia using either the HIF-1a or HIF-2a IRE radiolabeled probe. Black arrow: position of the shifted band.

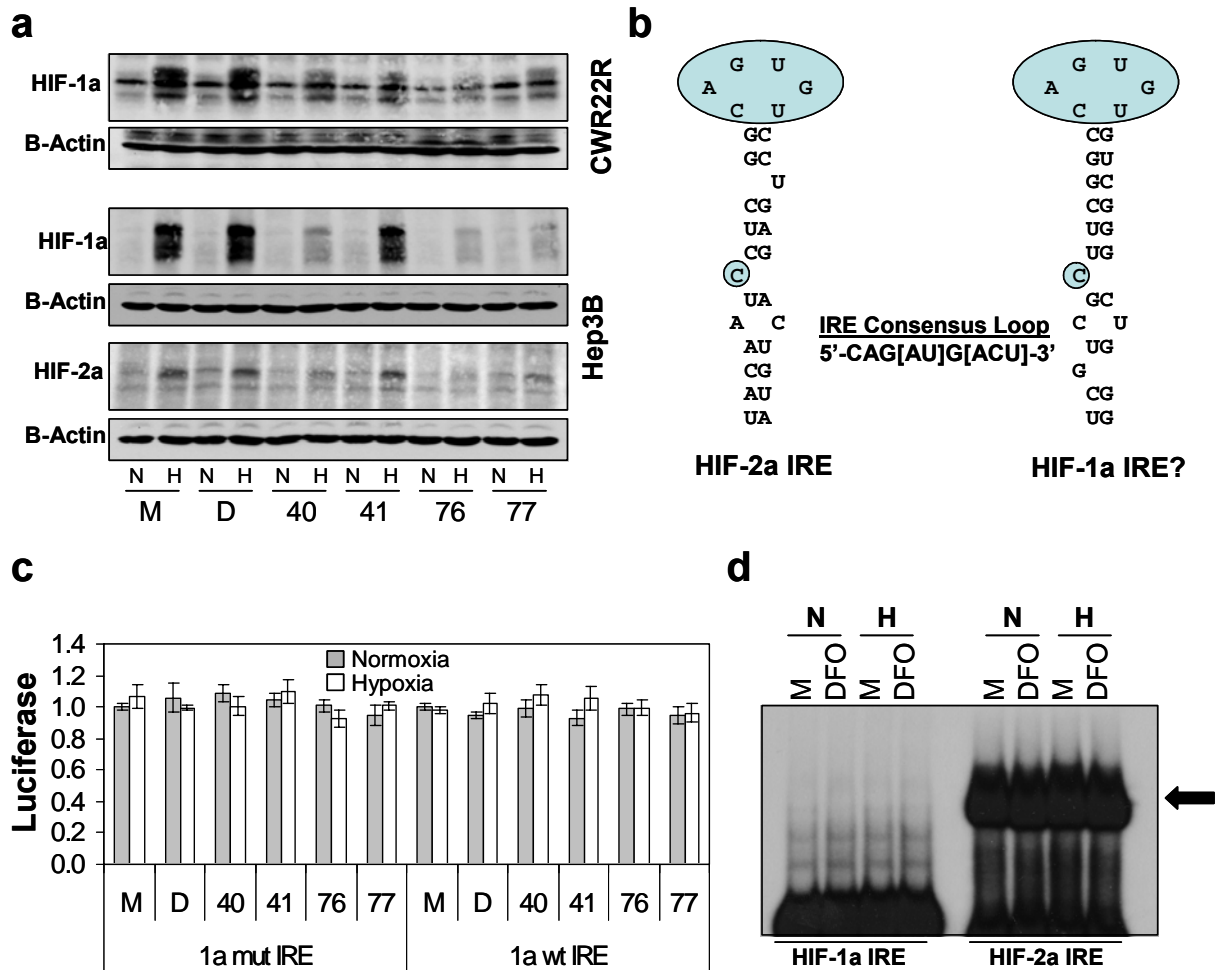

**Table S1. Identified HIF inhibitor compounds.**

| Name | Full Chemical Name                                                            |
|------|-------------------------------------------------------------------------------|
| 20   | 3-(2,5-diethoxyphenyl)-1-(2-thienyl)-2-propen-1-one                           |
| 37   | N <sup>2</sup> -(4-bromo-3-nitrobenzoyl)leucinamide                           |
| 39   | 2-bromo-N-(2-methoxyphenyl)propanamide                                        |
| 40   | 5-(dimethylamino)-2-methyl-1-phenyl-1-penten-3-one hydrochloride              |
| 41   | 4-hydroxy-3-[3-(2-hydroxy-5-methoxyphenyl)acryloyl]-6-methyl-2H-pyran-2-one   |
| 42   | 6-(1,3-dioxo-1H-benzo[de]isoquinolin-2(3H)-yl)-N-hydroxyhexanamide            |
| 76   | methyl 3-{2-[cyano(methylsulfonyl)methylene]hydrazino}thiophene-2-carboxylate |
| 77   | 4-[(2,2-dimethyl-4-oxo-3,4-dihydro-2H-thiin-6-yl)thio]-3-nitrobenzotrile      |

**Table S2. Regulation of HIF and VHL target genes by identified compounds.**

| Gene set          | Description                                                   | 40                     | 41                                   | 76                     | 77                     |
|-------------------|---------------------------------------------------------------|------------------------|--------------------------------------|------------------------|------------------------|
| PRC3, VHL null    | Markers of PRC3 cells compared to WT8 cells                   | NES: -3.50<br>p < .001 | NES <sup>a</sup> : -2.98<br>p < .001 | NES: -3.15<br>p < .001 | NES: -3.15<br>p < .001 |
| Staller, VHL null | Markers of VHL null cells compared to VHL WT cells            | NES: -2.48<br>p < .001 | NES: -2.42<br>p < .001               | NES: -2.45<br>p < .001 | NES: -2.45<br>p < .001 |
| Schofield, HIF    | Validated HIF-regulated genes as reviewed by Schofield et al. | NES: -1.65<br>p < .001 | NES: -1.62<br>p = .005               | NES: -1.78<br>p = .002 | NES: -1.78<br>p = .002 |
| WT8, VHL WT       | Markers of WT8 cells compared to PRC3 cells                   | NES: -1.86<br>p < .001 | NES: 1.58<br>p < .007                | NES: 1.88<br>p < .001  | NES: 1.88<br>p < .001  |
| Staller, VHL WT   | Markers of VHL WT cells compared to VHL null cells            | NES: -1.75<br>p < .001 | NES: 1.62<br>p < .001                | NES: 1.53<br>p = .002  | NES: 1.53<br>p = .002  |

<sup>a</sup> Using the GSEA algorithm, normalized enrichment scores (NES) was calculated for each gene set. A negative NES indicates downregulation of the set of genes by the compound, and a positive score indicates upregulation. Statistical significance was determined by permutation testing.

**Table S3. Published HIF inhibitor compounds.**

| Name         | Method of Identification  | Mechanism of HIF inhibition   | Biological Activities             | Ref.                     |
|--------------|---------------------------|-------------------------------|-----------------------------------|--------------------------|
| Chemotin     | HTS-p300-HIF interaction  | p300-HIF interaction          | tumor suppression                 | (Kung et al., 2004)      |
| Topotecan    | HTS- HRE-glioma cell line | HIF translation               | VEGF decrease                     | (Rapisarda et al., 2002) |
| 103D5R       | HTS-HRE-glioma cell line  | HIF translation               | Decreases HIF tested target genes | (Tan et al., 2005)       |
| YC-1         | Direct Testing            | HIF protein levels            | VEGF decrease/tumor suppression   | (Yeo et al., 2003)       |
| GL331        | Direct testing            | Protein levels                | Inhibits HUVEC proliferation      | (Chang et al., 2003)     |
| Geldanamycin | Direct testing            | HSP90 inhibitor-HIF half life | Tumor suppression                 | (Mabjeesh et al., 2002)  |
| 2-ME2        | Direct testing            | Post-transcriptional          | Inhibits HUVEC proliferation      | (Mabjeesh et al., 2003)  |
| Bisphenol    | Direct testing            | HIF degradation               | No report                         | (Kubo et al., 2004)      |
| Berberine    | Direct testing            | HIF degradation               | No report                         | (Lin et al., 2004)       |
| PX-478       | Thioredoxin inhibitor     | Unknown                       | Tumor suppression                 | (Welsh et al., 2004)     |
| PX-12        | Thioredoxin inhibitor     | Unknown                       | Tumor suppression                 | (Welsh et al., 2004)     |

**Table S4. Plasmids used in this study.**

| <b>Plasmid</b>           | <b>Description</b>                                                                                                                                                                                                              | <b>Ref.</b> |
|--------------------------|---------------------------------------------------------------------------------------------------------------------------------------------------------------------------------------------------------------------------------|-------------|
| pGL3 basic               | Promoterless luciferase expression vector                                                                                                                                                                                       | Promega     |
| pGL3 promoter            | SV40-luciferase expression vector                                                                                                                                                                                               | Promega     |
| pGL3::HIF2p              | 1000nt HIF-2a promoter PCR fragment cloned into pGL3 basic vector (cut <i>NheI/HindIII</i> )                                                                                                                                    | This work   |
| pGL3::HIF2p-UTR          | 1000nt HIF-2a promoter with 5'-UTR PCR fragment cloned into pGL3 basic (cut <i>NheI/HindIII</i> )                                                                                                                               | This work   |
| pGL3::SV-UTR             | SV40-luciferase vector with HIF-2a 5'-UTR (cut <i>NcoI</i> and screened for orientation)                                                                                                                                        | This work   |
| pGL3::HRE1               | 1xHRE-luciferase made from pGLH3 basic vector (cut <i>NheI/XhoI</i> ) <sup>a</sup>                                                                                                                                              | This work   |
| pGL3::HRE2               | 2xHRE-luciferase made from pGLH3 basic vector (cut <i>MluI/XhoI</i> ) <sup>a</sup>                                                                                                                                              | This work   |
| pGL3::HRE3               | 3xHRE-luciferase made from pGLH3 basic vector (cut <i>SacI/XhoI</i> ) <sup>a</sup>                                                                                                                                              | This work   |
| pGL3::HRE4               | 4xHRE-luciferase made from pGLH3 basic vector (cut <i>KpnI/XhoI</i> ) <sup>a</sup>                                                                                                                                              | This work   |
| pGL3::HIF2p-UTR1         | 1-100 nt HIF-2a 5'-UTR PCR fragment cloned into pGL3::HIF2p (cut <i>HindIII/NcoI</i> )                                                                                                                                          | This work   |
| pGL3::HIF2p-UTR3         | 100-200 nt HIF-2a 5'-UTR PCR fragment cloned into pGL3::HIF2p (cut <i>HindIII/NcoI</i> )                                                                                                                                        | This work   |
| pGL3::HIF2p-UTR5         | 200-300 nt HIF-2a 5'-UTR PCR fragment cloned into pGL3::HIF2p (cut <i>HindIII/NcoI</i> )                                                                                                                                        | This work   |
| pGL3::HIF2p-UTR10        | 1-250 nt HIF-2a 5'-UTR PCR fragment cloned into pGL3::HIF2p (cut <i>HindIII/NcoI</i> )                                                                                                                                          | This work   |
| pGL3::HIF2p-UTR12        | 250-488 nt HIF-2a 5'-UTR PCR fragment cloned into pGL3::HIF2p (cut <i>HindIII/NcoI</i> )                                                                                                                                        | This work   |
| pGL3::HIF2p-UTR13        | 1-488 nt (full length) HIF-2a 5'-UTR PCR fragment cloned into pGL3::HIF2p (cut <i>HindIII/NcoI</i> )                                                                                                                            | This work   |
| pGL3::HIF2p-UTR16        | 50-100 nt HIF-2a 5'-UTR fragment generated using annealed oligos with overhanging <i>HindIII/NcoI</i> sites cloned into pGL3::HIF2p (cut <i>HindIII/NcoI</i> )                                                                  | This work   |
| pGL3::HIF2p-UTR17        | Mutant 50-100 nt HIF-2a 5'-UTR fragment generated using annealed oligos with overhanging <i>HindIII/NcoI</i> sites cloned into pGL3::HIF2p (cut <i>HindIII/NcoI</i> ) in which CAGTGT of the IRE stem loop is changed to CAAAGT | This work   |
| pGL3::HIF2p-1aUTR16      | 35-86 nt HIF-1a 5'-UTR fragment generated using annealed oligos with overhanging <i>HindIII/NcoI</i> sites cloned into pGL3::HIF2p (cut <i>HindIII/NcoI</i> )                                                                   | This work   |
| pGL3::HIF2p-1aUTR17      | Mutant 35-86 nt HIF-1a 5'-UTR fragment generated using annealed oligos with overhanging <i>HindIII/NcoI</i> sites cloned into pGL3::HIF2p (cut <i>HindIII/NcoI</i> ) in which CAGTGT of the IRE stem loop is changed to CAAAGT  | This work   |
| pcDNA3.1                 | Mammalian expression vector                                                                                                                                                                                                     | Invitrogen  |
| pcDNA3.1::SV40           | SV40-luciferase from pGL3 promoter (cut <i>NotI/XbaI</i> ) subcloned into pcDNA3.1 (cut <i>MluI<sup>h</sup>/XbaI</i> )                                                                                                          | This work   |
| pcDNA3.1::HRE4           | 4xHRE-luciferase from pGLH4 (cut <i>NotI/XbaI</i> ) subcloned into pcDNA3.1 (cut <i>MluI<sup>h</sup>/XbaI</i> )                                                                                                                 | This work   |
| pcDNA3.1::HIF2p          | HIF-2a promoter-luciferase from pGL3::HIF2p (cut <i>NotI<sup>h</sup>/XbaI</i> ) subcloned into pcDNA3.1 (cut <i>MluI<sup>h</sup>/XbaI</i> )                                                                                     | This work   |
| pcDNA3.1::HIF2p-UTR      | HIF-2a promoter-UTR-luciferase from pGL3::HIF2p-UTR (cut <i>BglI<sup>h</sup>/XbaI</i> ) subcloned into pcDNA3.1 (cut <i>MluI<sup>h</sup>/XbaI</i> )                                                                             | This work   |
| pcDNA3.1::SV40-UTR       | SV40-UTR-luciferase from pGL3::SV-UTR (cut <i>NotI<sup>h</sup>/XbaI</i> ) subcloned into pcDNA3.1 (cut <i>MluI<sup>h</sup>/XbaI</i> )                                                                                           | This work   |
| pcDNA3.1::CMV            | CMV-Luciferase in pcDNA3.1                                                                                                                                                                                                      | This work   |
| pcDNA3.1::CMV-SL         | CMV-SL-luciferase in pcDNA3.1 (SL is a synthetic 5'-UTR with a stem loop to measure RNA helicase activity)                                                                                                                      | This work   |
| pcDNA3.1::HIF2p-UTR1     | HIF-2a promoter-UTR1-luciferase from pGL3::HIF2p-UTR1 (cut <i>BglI<sup>h</sup>/XbaI</i> ) subcloned into pcDNA3.1 (cut <i>MluI<sup>h</sup>/XbaI</i> )                                                                           | This work   |
| pcDNA3.1::HIF2p-UTR3     | HIF-2a promoter-UTR1-luciferase from pGL3::HIF2p-UTR3 (cut <i>BglI<sup>h</sup>/XbaI</i> ) subcloned into pcDNA3.1 (cut <i>MluI<sup>h</sup>/XbaI</i> )                                                                           | This work   |
| pcDNA3.1::HIF2p-UTR5     | HIF-2a promoter-UTR1-luciferase from pGL3::HIF2p-UTR5 (cut <i>BglI<sup>h</sup>/XbaI</i> ) subcloned into pcDNA3.1 (cut <i>MluI<sup>h</sup>/XbaI</i> )                                                                           | This work   |
| pcDNA3.1::HIF2p-UTR10    | HIF-2a promoter-UTR1-luciferase from pGL3::HIF2p-UTR10 (cut <i>BglI<sup>h</sup>/XbaI</i> ) subcloned into pcDNA3.1 (cut <i>MluI<sup>h</sup>/XbaI</i> )                                                                          | This work   |
| pcDNA3.1::HIF2p-UTR12    | HIF-2a promoter-UTR1-luciferase from pGL3::HIF2p-UTR12 (cut <i>BglI<sup>h</sup>/XbaI</i> ) subcloned into pcDNA3.1 (cut <i>MluI<sup>h</sup>/XbaI</i> )                                                                          | This work   |
| pcDNA3.1::HIF2p-UTR16    | HIF-2a promoter-UTR1-luciferase from pGL3::HIF2p-UTR16 (cut <i>BglI<sup>h</sup>/XbaI</i> ) subcloned into pcDNA3.1 (cut <i>MluI<sup>h</sup>/XbaI</i> )                                                                          | This work   |
| pcDNA3.1::HIF2p-UTR17    | HIF-2a promoter-UTR1-luciferase from pGL3::HIF2p-UTR17 (cut <i>BglI<sup>h</sup>/XbaI</i> ) subcloned into pcDNA3.1 (cut <i>MluI<sup>h</sup>/XbaI</i> )                                                                          | This work   |
| pcDNA3.1::HIF2p-1aUTR16  | HIF-2a promoter-UTR1-luciferase from pGL3::HIF2p-UTR16 (cut <i>BglI<sup>h</sup>/XbaI</i> ) subcloned into pcDNA3.1 (cut <i>MluI<sup>h</sup>/XbaI</i> )                                                                          | This work   |
| pcDNA3.1::HIF2p-1aUTR17  | HIF-2a promoter-UTR1-luciferase from pGL3::HIF2p-UTR17 (cut <i>BglI<sup>h</sup>/XbaI</i> ) subcloned into pcDNA3.1 (cut <i>MluI<sup>h</sup>/XbaI</i> )                                                                          | This work   |
| pcDNA3.1::UTR16 probe    | pGL3::HIF2p-UTR16 (cut <i>HindIII/XbaI</i> ) cloned into pcDNA3.1 (cut <i>HindIII/XbaI</i> ) to maintain T7 promoter for EMSA probe                                                                                             | This work   |
| pcDNA3.1::UTR17 probe    | pGL3::HIF2p-UTR17 (cut <i>HindIII/XbaI</i> ) cloned into pcDNA3.1 (cut <i>HindIII/XbaI</i> ) to maintain T7 promoter for EMSA probe                                                                                             | This work   |
| pRL-SV40                 | Control SV40-Renilla luciferase construct used to normalize transient transfections                                                                                                                                             | Promega     |
| pIRESpuro                | Mammalian Internal Ribosomal Entry Site (IRES) expression vector                                                                                                                                                                | BD          |
| pIRESpuro::HIF-2a(P531A) | Degradation-resistant HIF-2a(P531A) mutant                                                                                                                                                                                      | Biosciences |
| pIRESHygro               | Mammalian Internal Ribosomal Entry Site (IRES) expression vector                                                                                                                                                                | BD          |
| pIRESHygro::dnHIFA       | Dominant negative HIF-2a construct lacking transactivation domain (aa's 1-517)                                                                                                                                                  | Biosciences |
|                          |                                                                                                                                                                                                                                 | This work   |

|                            |                                                                                                                                                                                                                                               |                           |
|----------------------------|-----------------------------------------------------------------------------------------------------------------------------------------------------------------------------------------------------------------------------------------------|---------------------------|
| pIRESHygro::dnHIFB         | Dominant negative HIF-2a construct lacking transactivation domain including N-terminus NLS sequence (aa's 1-517 fused to aa's 738-741)                                                                                                        | This work                 |
| pIRESHygro::dnHIFC         | Dominant negative HIF-2a construct lacking N- and C-terminal transactivation domains (aa's 530-682 and 828-870)                                                                                                                               | This work                 |
| pRC/CMV                    | Mammalian expression vector                                                                                                                                                                                                                   | (Iliopoulos et al., 1995) |
| pRC/CMV::VHL30             | VHL30 cloned into pRC/CMV                                                                                                                                                                                                                     | (Iliopoulos et al., 1995) |
| pTUIIa <sup>a</sup>        | Stable hairpin shRNAi expression vector                                                                                                                                                                                                       | (Zimmer et al., 2004)     |
| pTUIIa::HIF-2a             | Stable hairpin shRNAi expression vector targeting HIF-2a                                                                                                                                                                                      | (Zimmer et al., 2004)     |
| pLentiLox3.7puro           | pLentiLox3.7 vector conferring puromycin resistance                                                                                                                                                                                           | J. Rocco, unpublished     |
| pLentiLox3.7hygro          | pLentiLox3.7 vector conferring hygromycin resistance                                                                                                                                                                                          | J. Rocco, unpublished     |
| pLentiLox3.7blasti         | pLentiLox3.7 vector conferring blasticidin resistance                                                                                                                                                                                         | J. Rocco, unpublished     |
| pLentiLox3.7puro::IRP1-15  | The following oligos were annealed and ligated in to pLentiLox3.7puro (cut <i>XhoI/HpaI</i> ):<br>5'-TGACCTTCAGGCTGTCATGAGGTTCAAGAGACCTCATGACAGCCTGGAAGGCTTTTTTC-3'<br>5'-TCGAGAAAAAGACCTTCAGGCTGTCATGAGGTTCTTGAACCTCATGACAGCCTGGAAGGTCA-3'   | This work                 |
| pLentiLox3.7hygro::IRP1-14 | The following oligos were annealed and ligated in to pLentiLox3.7hygro (cut <i>XhoI/HpaI</i> ):<br>5'-TGCCATCACACAGGAGACCTTGTTCAGAGACAAGGTTCTCCCTGTGTGATGGCTTTTTTC-3'<br>5'-TCGAGAAAAAGCCATCACACAGGAGACCTTGTCTCTTGAACAAGGTTCCCTGTGTGATGGCA-3' | This work                 |
| pLentiLox3.7blasti::IRP2-4 | The following oligos were annealed and ligated in to pLentiLox3.7blasti (cut <i>XhoI/HpaI</i> ):<br>5'-TGGATTCTGGGGTGGGGGTCTTTCACCCCCACCCAGAAATCCTTTTTTC-3'<br>5'-TCGAGAAAAAGGATTCTGGGGTGGGGGTGAAGAGACCCCCACCCAGAATCCA-3'                     | This work                 |
| pMDLG/pRRE                 | LentiLox3.7 helper plasmid encoding gag/pol elements                                                                                                                                                                                          | (Dull et al., 1998)       |
| pRSV-Rev                   | LentiLox3.7 helper plasmid encoding Rev                                                                                                                                                                                                       | (Dull et al., 1998)       |
| pCMV-VSVG                  | LentiLox3.7 helper plasmid encoding envelope for viral pseudotyping                                                                                                                                                                           | (Dull et al., 1998)       |

<sup>a</sup> HRE (5'-CCACAGTGCATACGTGGGCTCCAACAGTCCTCTCCCTCCCATGCA-3') cloned into pGL3 basic vector using 4 sets of annealed oligos with overhanging *KpnI*, *SacI*, *MluI*, *NheI* or *XhoI* sites. Final product was *KpnI*-HRE4-*SacI*-HRE3-*MluI*-HRE2-*NheI*-HRE1-*XhoI* where *SacI*, *MluI* and *NheI* sites were destroyed.

<sup>b</sup> site blunt-ended following restriction digest using T7 polymerase

**Table S5. Cell lines used in this study.**

| Cell line               | Description                                                                                                         | Ref.                       |
|-------------------------|---------------------------------------------------------------------------------------------------------------------|----------------------------|
| U2OS                    | Osteosarcoma cell line used for transient transfection experiments                                                  | (Ponten and Saksela, 1967) |
| Hep3B                   | Hepatoblastoma                                                                                                      | (Aden et al., 1979)        |
| 786-O                   | VHL <sup>-/-</sup> Renal Clear Cell Carcinoma (RCC)                                                                 | (Williams et al., 1978)    |
| WT8                     | 786-O derived clone stably transfected with pRC/CMV::VHL30, <i>neo<sup>r</sup></i>                                  | (Iliopoulos et al., 1995)  |
| PRC3                    | Matched vector only control for WT8 cells, <i>neo<sup>r</sup></i>                                                   | (Iliopoulos et al., 1995)  |
| 7TR1                    | 786-O derived clone stably transfected with pTUIIa::HIF-2a targeting shRNAi, <i>blasti<sup>r</sup></i>              | (Zimmer et al., 2004)      |
| 7TV1                    | Matched vector only control for 7TR1 cells, <i>blasti<sup>r</sup></i>                                               | (Zimmer et al., 2004)      |
| 7H4                     | 786-O derived clone stably transfected with pcDNA3.1::HRE4, <i>neo<sup>r</sup></i>                                  | This work                  |
| 7SV                     | 786-O derived clone stably transfected with pDNA3.1::SV40, <i>neo<sup>r</sup></i>                                   | This work                  |
| 7SV-UTR                 | 786-O derived polyclonal line stably transfected with pDNA3.1::SV40-UTR, <i>neo<sup>r</sup></i>                     | This work                  |
| 7H2P2                   | 786-O derived polyclonal line stably transfected with pcDNA3.1::HIF2p, <i>neo<sup>r</sup></i>                       | This work                  |
| 7H2P3                   | 786-O derived polyclonal line stably transfected with pcDNA3.1::HIF2p-UTR, <i>neo<sup>r</sup></i>                   | This work                  |
| 7CMV                    | 786-O derived polyclonal line stably transfected with pcDNA3.1::CMV, <i>neo<sup>r</sup></i>                         | (Yang et al., 2004)        |
| 7H2P2-UTR1              | 786-O derived polyclonal line stably transfected with pcDNA3.1::HIF2p-UTR1, <i>neo<sup>r</sup></i>                  | This work                  |
| 7H2P2-UTR3              | 786-O derived polyclonal line stably transfected with pcDNA3.1::HIF2p-UTR3, <i>neo<sup>r</sup></i>                  | This work                  |
| 7H2P2-UTR5              | 786-O derived polyclonal line stably transfected with pcDNA3.1::HIF2p-UTR5, <i>neo<sup>r</sup></i>                  | This work                  |
| 7H2P2-UTR10             | 786-O derived polyclonal line stably transfected with pcDNA3.1::HIF2p-UTR10, <i>neo<sup>r</sup></i>                 | This work                  |
| 7H2P2-UTR12             | 786-O derived polyclonal line stably transfected with pcDNA3.1::HIF2p-UTR12, <i>neo<sup>r</sup></i>                 | This work                  |
| 7H2P2-UTR13             | 786-O derived polyclonal line stably transfected with pcDNA3.1::HIF2p-UTR13, <i>neo<sup>r</sup></i>                 | This work                  |
| 7H2P2-UTR16             | 786-O derived polyclonal line stably transfected with pcDNA3.1::HIF2p-UTR16, <i>neo<sup>r</sup></i>                 | This work                  |
| 7H2P2-UTR17             | 786-O derived polyclonal line stably transfected with pcDNA3.1::HIF2p-UTR17, <i>neo<sup>r</sup></i>                 | This work                  |
| 7H2P2-1aUTR16           | 786-O derived polyclonal line stably transfected with pcDNA3.1::HIF2p-1aUTR16, <i>neo<sup>r</sup></i>               | This work                  |
| 7H2P2-1aUTR17           | 786-O derived polyclonal line stably transfected with pcDNA3.1::HIF2p-1aUTR17, <i>neo<sup>r</sup></i>               | This work                  |
| 7CMV-SL                 | 786-O derived polyclonal line stably transfected with pcDNA3.1::CMV-SL, <i>neo<sup>r</sup></i>                      | (Yang et al., 2004)        |
| 7UTR16 v.o.             | 7H2P2-UTR16 line infected with pLentiLox3.7puro, pLentiLox3.7hygro and pLentiLox3.7blasti                           | This work                  |
| 7UTR16 IRP1 k.d.        | 7H2P2-UTR16 line infected with pLentiLox3.7puro::IRP1-15, pLentiLox3.7hygro::IRP1-14 and pLentiLox3.7blasti         | This work                  |
| 7UTR16 IRP2 k.d.        | 7H2P2-UTR16 line infected with pLentiLox3.7puro, pLentiLox3.7hygro and pLentiLox3.7blasti::IRP2-4                   | This work                  |
| 7UTR16 IRP1/2 k.d. A498 | 7H2P2-UTR16 line infected with pLentiLox3.7puro::IRP1-15, pLentiLox3.7hygro::IRP1-14 and pLentiLox3.7blasti::IRP2-4 | This work                  |
| A-H4                    | A498 derived polyclonal line stably transfected with pcDNA3.1::HRE4, <i>neo<sup>r</sup></i>                         | (Giard et al., 1973)       |
| A-SV                    | A498 derived polyclonal line stably transfected with pDNA3.1::SV40, <i>neo<sup>r</sup></i>                          | This work                  |
| UMRC2                   | VHL <sup>-/-</sup> RCC                                                                                              | (Grossman et al., 1985)    |
| U2-H4                   | UMRC2 derived polyclonal line stably transfected with pcDNA3.1::HRE4, <i>neo<sup>r</sup></i>                        | This work                  |
| U2-SV                   | UMRC2 derived polyclonal line stably transfected with pDNA3.1::SV40, <i>neo<sup>r</sup></i>                         | This work                  |
| UMRC3                   | VHL <sup>-/-</sup> RCC                                                                                              | (Grossman et al., 1985)    |
| U3-H4                   | UMRC3 derived polyclonal line stably transfected with pcDNA3.1::HRE4, <i>neo<sup>r</sup></i>                        | This work                  |
| U3-SV                   | UMRC3 derived polyclonal line stably transfected with pDNA3.1::SV40, <i>neo<sup>r</sup></i>                         | This work                  |
| UOK121                  | VHL <sup>-/-</sup> RCC                                                                                              | (Herman et al., 1994)      |
| UK-H4                   | UOK121 derived polyclonal line stably transfected with pcDNA3.1::HRE4, <i>neo<sup>r</sup></i>                       | This work                  |
| UK-SV                   | UOK121 derived polyclonal line stably transfected with pDNA3.1::SV40, <i>neo<sup>r</sup></i>                        | This work                  |

*neo<sup>r</sup>*, neomycin/G418 resistant; *blasti<sup>r</sup>*, blasticidin resistant

## Supplemental References

- Aden, D. P., Fogel, A., Plotkin, S., Damjanov, I., and Knowles, B. B. (1979). Controlled synthesis of HBsAg in a differentiated human liver carcinoma-derived cell line. *Nature* 282, 615-616.
- Chang, H., Shyu, K. G., Lee, C. C., Tsai, S. C., Wang, B., Hsien Lee, Y., and Lin, S. (2003). GL331 inhibits HIF-1 $\alpha$  expression in a lung cancer model. *Biochem Biophys Res Commun* 302, 95-100.
- Dull, T., Zufferey, R., Kelly, M., Mandel, R. J., Nguyen, M., Trono, D., and Naldini, L. (1998). A third-generation lentivirus vector with a conditional packaging system. *J Virol* 72, 8463-8471.
- Giard, D. J., Aaronson, S. A., Todaro, G. J., Arnstein, P., Kersey, J. H., Dosik, H., and Parks, W. P. (1973). In vitro cultivation of human tumors: establishment of cell lines derived from a series of solid tumors. *J Natl Cancer Inst* 51, 1417-1423.
- Grossman, H. B., Wedemeyer, G., and Ren, L. Q. (1985). Human renal carcinoma: characterization of five new cell lines. *J Surg Oncol* 28, 237-244.
- Herman, J. G., Latif, F., Weng, Y., Lerman, M. I., Zbar, B., Liu, S., Samid, D., Duan, D.-S. R., Gnarr, J. R., Linhean, W. M., and Baylin, S. B. (1994). Silencing of the VHL tumor-suppressor gene by DNA methylation in renal carcinoma. *Proc Natl Acad Sci (USA)* 91, 9700-9704.
- Iliopoulos, O., Kibel, A., Gray, S., and Kaelin, W. G. (1995). Tumor Suppression by the Human von Hippel-Lindau Gene Product. *Nature Medicine* 1, 822-826.
- Kubo, T., Maezawa, N., Osada, M., Katsumura, S., Funae, Y., and Imaoka, S. (2004). Bisphenol A, an environmental endocrine-disrupting chemical, inhibits hypoxic response via degradation of hypoxia-inducible factor 1 $\alpha$  (HIF-1 $\alpha$ ): structural requirement of bisphenol A for degradation of HIF-1 $\alpha$ . *Biochem Biophys Res Commun* 318, 1006-1011.
- Kung, A. L., Zabludoff, S. D., France, D. S., Freedman, S. J., Tanner, E. A., Vieira, A., Cornell-Kennon, S., Lee, J., Wang, B., Wang, J., *et al.* (2004). Small molecule blockade of transcriptional coactivation of the hypoxia-inducible factor pathway. *Cancer Cell* 6, 33-43.
- Lin, S., Tsai, S. C., Lee, C. C., Wang, B. W., Liou, J. Y., and Shyu, K. G. (2004). Berberine inhibits HIF-1 $\alpha$  expression via enhanced proteolysis. *Mol Pharmacol* 66, 612-619.
- Mabjeesh, N. J., Escuin, D., LaVallee, T. M., Pribluda, V. S., Swartz, G. M., Johnson, M. S., Willard, M. T., Zhong, H., Simons, J. W., and Giannakakou, P. (2003). 2ME2 inhibits tumor growth and angiogenesis by disrupting microtubules and dysregulating HIF. *Cancer Cell* 3, 363-375.
- Mabjeesh, N. J., Post, D. E., Willard, M. T., Kaur, B., Van Meir, E. G., Simons, J. W., and Zhong, H. (2002). Geldanamycin induces degradation of hypoxia-inducible factor 1 $\alpha$  protein via the proteasome pathway in prostate cancer cells. *Cancer Res* 62, 2478-2482.
- Ponten, J., and Saksela, E. (1967). Two established in vitro cell lines from human mesenchymal tumours. *Int J Cancer* 2, 434-447.
- Rapisarda, A., Uranchimeg, B., Scudiero, D. A., Selby, M., Sausville, E. A., Shoemaker, R. H., and Melillo, G. (2002). Identification of small molecule inhibitors of hypoxia-inducible factor 1 transcriptional activation pathway. *Cancer Res* 62(15):, 4316-4324.
- Tan, C., de Noronha, R. G., Roecker, A. J., Pyrzynska, B., Khwaja, F., Zhang, Z., Zhang, H., Teng, Q., Nicholson, A. C., Giannakakou, P., *et al.* (2005). Identification of a novel small-molecule inhibitor of the hypoxia-inducible factor 1 pathway. *Cancer Res* 65, 605-612.

- Welsh, S., Williams, R., Kirkpatrick, L., Paine-Murrieta, G., and Powis, G. (2004). Antitumor activity and pharmacodynamic properties of PX-478, an inhibitor of hypoxia-inducible factor-1alpha. *Mol Cancer Ther* 3, 233-244.
- Williams, R. D., Elliott, A. Y., Stein, N., and Fraley, E. E. (1978). In vitro cultivation of human renal cell cancer. II. Characterization of cell lines. *In Vitro* 14, 779-786.
- Yang, H. S., Cho, M. H., Zakowicz, H., Hegamyer, G., Sonenberg, N., and Colburn, N. H. (2004). A novel function of the MA-3 domains in transformation and translation suppressor Pcd4 is essential for its binding to eukaryotic translation initiation factor 4A. *Mol Cell Biol* 24, 3894-3906.
- Yeo, E. J., Chun, Y. S., Cho, Y. S., Kim, J., Lee, J. C., Kim, M. S., and Park, J. W. (2003). YC-1: a potential anticancer drug targeting hypoxia-inducible factor 1. *J Natl Cancer Inst* 95, 516-525.
- Zimmer, M., Doucette, D., Siddiqui, N., and Iliopoulos, O. (2004). Inhibition of Hypoxia Inducible Factor is Sufficient for Growth Suppression of VHL<sup>-/-</sup> Tumors. *Mol Cancer Res* 2, 89-95.
